# Supplementary material for: Accelerating the Inbreeding of Multi-Parental Recombinant Inbred Lines Generated By Sibling Matings
Source: PubMed Central journal article supplement (PMC3284326; doi:10.1534/g3.111.001784), 2012-02-01
Supplement: supp_2.2.191_FigureS1.pdf [file supp_2.2.191_FigureS1.pdf]

## BACKCROSSING PEDIGREES

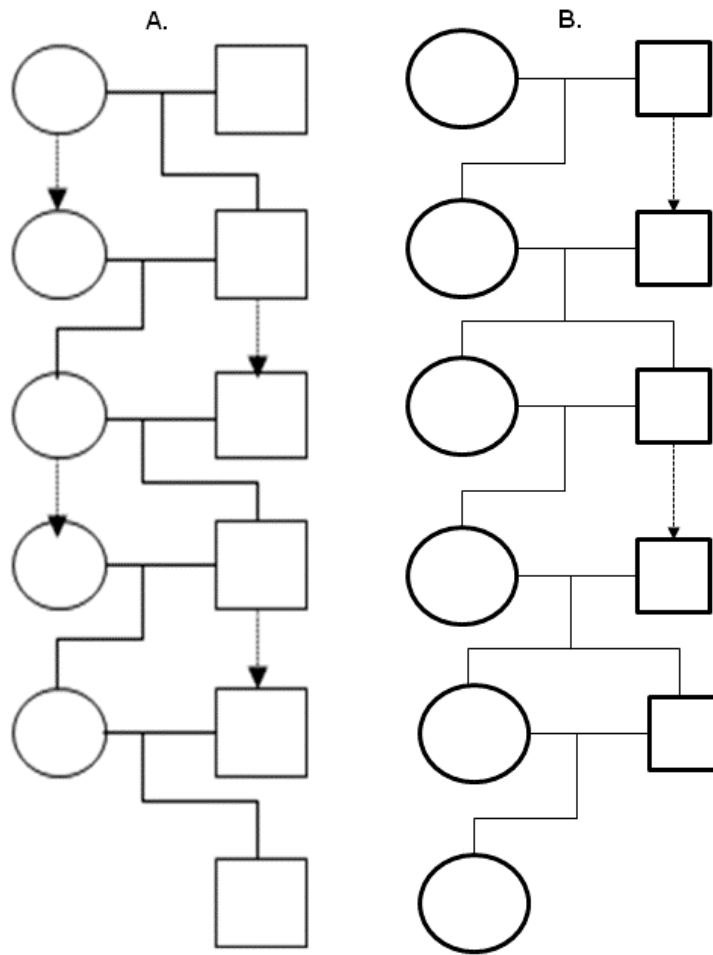

**Figure S1** This figure shows the pedigree diagrams for the alternating backcrosses: father-daughter backcross with the mother-son backcross (A) and the father-daughter with the random sib-mating (B).
